# Supplementary material for: Diverse Role of SNARE Protein Sec22 in Vesicle Trafficking, Membrane Fusion, and Autophagy
Source: PubMed Central journal article supplement (PMC6523435; doi:10.3390/cells8040337), 2019-04-10
Supplement: cells-08-00337-s001.pdf [file cells-08-00337-s001.pdf]

**Table S1: Sec22 SNARE homologues used during this study**

| Organism                         | E-Value | NCBI reference number | Longin domain (aa) | Coil coiled region (aa) | Low complexity region (aa) | TMD length (aa) |
|----------------------------------|---------|-----------------------|--------------------|-------------------------|----------------------------|-----------------|
| <i>Saccharomyces cerevisiae</i>  | 8e-161  | NP_013370.1           | 33-116             | 127-150                 | 159-172                    | 189-211         |
| <i>Sordaria macrospora</i>       | 9e-163  | XP_003346158.1        | 34-119             |                         |                            | 197-216         |
| <i>Colletotrichum orbiculare</i> | 4e-149  | BAO27797.1            | 34-118             | 129-152                 |                            | 191-213         |
| <i>Fusarium graminearum</i>      | 7e-163  | XP_011323737.1        | 34-118             | 129-151                 |                            | 191-213         |
| <i>Magnaporthe oryzae</i>        | 2e-161  | XP_003719791.1        | 34-119             | 130-153                 |                            | 192-214         |
| <i>Arabidopsis thaliana</i>      | 1e-165  | NP_172653.1           | 35-119             |                         |                            | 193-212         |
| <i>Nicotiana tabacum</i>         | 7e-165  | XP_016484743.1        | 35-119             |                         |                            | 193-215         |
| <i>Drosophila melanogaster</i>   | 5e-159  | NP_569863.1           | 36-118             |                         |                            | 189-210         |
| <i>Homo sapiens</i>              | 3e-162  | NP_004883.3           | 36-118             |                         | 162-179                    | 191-213         |
| <i>Rattus norvegicus</i>         | 1e-162  | NP_001020857.1        | 36-118             |                         | 162-179                    | 191-213         |
| <i>Mus musculus</i>              | 2e-162  | NP_035472.1           | 36-118             |                         | 162-179                    | 191-213         |
| <i>Caenorhabditis elegans</i>    | 7e-161  | NP_508198.1           | 37-118             |                         | 160-186                    | 191-312         |
| <i>Plasmodium falciparum</i>     | 7e-162  | XP_001351271.1        | 31-123             |                         |                            | 194-216         |

\*Blue color represents absence of coil coiled region or low complexity region

| Organism                        | Functions of Sec22                                                                                                           | Sec22 interacting proteins                                            | Function of Sec22 interacting proteins                                                                                                                                                                                                                                                                                                                                                                                                                                                                                                                                                                                                                                                                                  | References                                                                                                                                                                                                                                                                                   |
|---------------------------------|------------------------------------------------------------------------------------------------------------------------------|-----------------------------------------------------------------------|-------------------------------------------------------------------------------------------------------------------------------------------------------------------------------------------------------------------------------------------------------------------------------------------------------------------------------------------------------------------------------------------------------------------------------------------------------------------------------------------------------------------------------------------------------------------------------------------------------------------------------------------------------------------------------------------------------------------------|----------------------------------------------------------------------------------------------------------------------------------------------------------------------------------------------------------------------------------------------------------------------------------------------|
| <i>Saccharomyces cerevisiae</i> | Anterograde and retrograde trafficking, uptake of caesium ions, cellulase secretion, maintenance of ER morphology, autophagy | Bet1, Bos1, Sed5, Sec20, Ufe1, Slt1, Snc1/2, Sey1, Rtn1, Tip20, atg9, | Bet1, Bos1, Sed5 collaborate with sec22 during anterograde transport. Bos1 or Bet1 overproduction suppresses the secretory and growth defects of Sec22 mutant. <u>Sec20</u> , <u>Ufe1</u> , <u>Slt1</u> , <u>Snc1/2</u> the ER proteins cooperate with Sec22 in the retrograde Golgi to ER trafficking. Sey1, and Sec22 are involved in the homotypic ER membrane fusion. Sey1, Rtn1 and Sec22 are involved in the normal ER morphology. Tip20 could be responsible for binding or uncoating of COPI coated retrograde transport vesicles. A subset of <i>tip20</i> mutants was found to be lethal in combination with Sec22. Sec22 enables atg9 recruitment to the phagophore assembly site and helps in autophagosome | (Newman et al., 1990; Lewis and Pelham, 1996, Lewis et al., 1997, Cosson et al., 1997; Frigerio, G., 1998; Tsui et al., 2001; Liu and Barlowe, 2002; Liu et al., 2004; Hu et al., 2009; Nair et al., 2011; Anwar et al., 2012; Dr äxl et al., 2013; Lee, et al., 2015; Van Zyl et al., 2016) |

|                                  |                                                                                                                                                                                                                                    |                                                       |                             |                                                |
|----------------------------------|------------------------------------------------------------------------------------------------------------------------------------------------------------------------------------------------------------------------------------|-------------------------------------------------------|-----------------------------|------------------------------------------------|
|                                  |                                                                                                                                                                                                                                    |                                                       | formation during autophagy. |                                                |
| <i>Sordaria macrospora</i>       | Effects vegetative growth, ascospore production, maturation, pigmentation, and germination. melanin biosynthesis, ER associated proteins and development related genes regulation                                                  | Melanin biosynthesis genes, development related genes |                             | (Traeger and Nowrousian, 2015).                |
| <i>Colletotrichum orbiculare</i> | Transport of virulence related effectors.                                                                                                                                                                                          |                                                       |                             | (Irieda et al., 2014).                         |
| <i>Fusarium graminearum</i>      | cell wall integrity, mycelial growth, conidial production, infection of the host plant, endocytosis (unpublished data)                                                                                                             |                                                       |                             | (Boenisch et al., 2017)                        |
| <i>Magnaporthe oryzae</i>        | cell wall integrity, mycelial growth, conidial production, infection of the host plant, normal chitin deposition, regulation of ROS level, endocytosis, efficient expression of the extracellular enzymes peroxidases and laccases | Need to study song et al paper                        |                             | (Song et al., 2010).                           |
| <i>Arabidopsis thaliana</i>      | Gametophyte development. Regulation of uptake of non-                                                                                                                                                                              |                                                       |                             | (El- Kasmi et al., 2011; Dr äxl et al., 2013). |

|                                                                                  |                                                                                                                                                                                             |                              |                                                                                                              |                                                                                                                                        |
|----------------------------------------------------------------------------------|---------------------------------------------------------------------------------------------------------------------------------------------------------------------------------------------|------------------------------|--------------------------------------------------------------------------------------------------------------|----------------------------------------------------------------------------------------------------------------------------------------|
|                                                                                  | essential cation caesium (Cs b)                                                                                                                                                             |                              |                                                                                                              |                                                                                                                                        |
| <i>Nicotiana tabacum</i>                                                         | Overexpression causes collapse of Golgi membrane proteins into ER                                                                                                                           | Memb11, Phytolongins (Phyl)  | Phyl1.1 export from the ER involves Sec22 along with other factors.                                          | (Chatre et al., 2005; de Marcos Lousa et al., 2016)                                                                                    |
| <i>Drosophila melanogaster</i>                                                   | Its mutation causes ER proliferation, expanded ER lumens, abnormal Golgi morphology, enlargement of late endosomes. Essential for eye morphogenesis and Wingless (Wg)/Wnt signaling pathway | Wingless/Wnt secretion       | Wingless (Wg)/Wnt signaling plays significant role in development, tissue homeostasis, and disease.          | (Zhao et al., 2015; Li et al., 2015).                                                                                                  |
| Mammals ( <i>Homo sapiens</i> , <i>Rattus norvegicus</i> , <i>Mus musculus</i> ) | Membrane fusion, autophagy, regulate cell motion. Protein trafficking, translocation, and downregulation in the hippocampus of aging and Alzheimer's disease brains.                        | Sl1 Use1, Sec20, Syntaxin-18 | Sl1 plays role in efficient protein secretion ER. Use1, Sec20, Syntaxin-18 play role in retrograde transport | (Burri et al., 2003; Dilcher et al., 2003; Chagoyen et al., 2006; Malsam and Söllner, 2011; Berchtold et al., 2013; Zhao et al. 2016). |
| <i>Caenorhabditis elegans</i>                                                    | Plays crucial role during import of RNAi silencing signals or cell autonomous RNAi                                                                                                          | Sid5                         | Sec22 interacts with RNA transport protein Sid5 associated with late endosome                                | (Zhao et al., 2016).                                                                                                                   |
| <i>Plasmodium falciparum</i>                                                     | Encompasses signals for ER/Golgi recycling and fractional export beyond the ER/Golgi interface                                                                                              |                              |                                                                                                              | (Ayong et al., 2009).                                                                                                                  |

| <b>Organism</b>                                                                            | <b>Functions of Sec22</b>                                                                                                                                                                                                          | <b>Reference</b> |
|--------------------------------------------------------------------------------------------|------------------------------------------------------------------------------------------------------------------------------------------------------------------------------------------------------------------------------------|------------------|
| <i>Saccharomyces cerevisiae</i>                                                            | Anterograde and retrograde trafficking, uptake of caesium ions, cellulase secretion, maintenance of ER morphology, autophagy                                                                                                       |                  |
| <i>Sordaria macrospora</i>                                                                 | Effects vegetative growth, ascospore production, maturation, pigmentation, and germination. melanin biosynthesis, ER associated proteins and development related genes regulation                                                  |                  |
| <i>Colletotrichum orbiculare</i>                                                           | Transport of virulence related effectors.                                                                                                                                                                                          |                  |
| <i>Fusarium graminearum</i>                                                                | cell wall integrity, mycelial growth, conidial production, infection of the host plant, endocytosis (unpublished data)                                                                                                             |                  |
| <i>Magnaporthe oryzae</i>                                                                  | cell wall integrity, mycelial growth, conidial production, infection of the host plant, normal chitin deposition, regulation of ROS level, endocytosis, efficient expression of the extracellular enzymes peroxidases and laccases |                  |
| <i>Arabidopsis thaliana</i>                                                                | Gametophyte development. Regulation of uptake of non-essential cation caesium (Cs <sup>þ</sup> )                                                                                                                                   |                  |
| <i>Nicotiana tabacum</i>                                                                   | Overexpression causes collapse of Golgi membrane proteins into ER                                                                                                                                                                  |                  |
| <i>Drosophila melanogaster</i>                                                             | Its mutation causes ER proliferation, expanded ER lumens, abnormal Golgi morphology, enlargement of late endosomes. Essential for eye morphogenesis and Wingless (Wg)/Wnt signaling pathway                                        |                  |
| <b>Mammals</b><br>( <i>Homo sapiens</i> , <i>Rattus norvegicus</i> , <i>Mus musculus</i> ) | Membrane fusion, autophagy, regulate cell motion. Protein trafficking, translocation, and downregulation in the hippocampus of aging and Alzheimer's disease brains.                                                               |                  |
| <i>Caenorhabditis elegans</i>                                                              | Plays crucial role during import of RNAi silencing signals or cell autonomous RNAi                                                                                                                                                 |                  |

|                             |                                                                                                |  |
|-----------------------------|------------------------------------------------------------------------------------------------|--|
| <i>Pasmodium falciparum</i> | Encompasses signals for ER/Golgi recycling and fractional export beyond the ER/Golgi interface |  |
|-----------------------------|------------------------------------------------------------------------------------------------|--|

| Sec22 interacting proteins                            | Function                                                                                                                                                                                                                                                                                                   | References |
|-------------------------------------------------------|------------------------------------------------------------------------------------------------------------------------------------------------------------------------------------------------------------------------------------------------------------------------------------------------------------|------------|
| Bet1                                                  | Bet1, Bos1, Sed5 collaborate with sec22 during anterograde transport. Bos1 or Bet1 overproduction suppresses the secretory and growth defects of Sec22 mutant.                                                                                                                                             |            |
| Bos1                                                  | Bet1, Bos1, Sed5 collaborate with sec22 during anterograde transport. Bos1 or Bet1 overproduction suppresses the secretory and growth defects of Sec22 mutant.                                                                                                                                             |            |
| Sed5                                                  |                                                                                                                                                                                                                                                                                                            |            |
| Sec20                                                 | <u>Sec20, Ufe1, Slt1, Snc1/2</u> the ER proteins cooperate with Sec22 in the retrograde Golgi to ER trafficking                                                                                                                                                                                            |            |
| Ufe1                                                  |                                                                                                                                                                                                                                                                                                            |            |
| Slt1                                                  |                                                                                                                                                                                                                                                                                                            |            |
| Snc1/2                                                |                                                                                                                                                                                                                                                                                                            |            |
| Sey1                                                  | Sey1, and Sec22 are involved in the homotypic ER membrane fusion. Sey1, Rtn1 and Sec22 are involved in the normal ER morphology.                                                                                                                                                                           |            |
| Rtn1                                                  |                                                                                                                                                                                                                                                                                                            |            |
| Tip20                                                 | Tip20 could be responsible for binding or uncoating of COPI coated retrograde transport vesicles. A subset of <i>tip20</i> mutants was found to be lethal in combination with Sec22. Sec22 enables atg9 recruitment to the phagophore assembly site and helps in autophagosome formation during autophagy. |            |
| atg9                                                  |                                                                                                                                                                                                                                                                                                            |            |
| Melanin biosynthesis genes, development related genes |                                                                                                                                                                                                                                                                                                            |            |

|                        |  |  |
|------------------------|--|--|
| Memb11,                |  |  |
| Wingless/Wnt secretion |  |  |
| Syntaxin-17            |  |  |
| Syntaxin-18            |  |  |
| Sid5                   |  |  |
| Phytolongins (Phyl)    |  |  |

Table 1. The complete set of yeast SNAREs. Each of the yeast SNAREs is listed according to its structural classification as Q- or RSNARE.

The Q-SNAREs have been further divided as Qa-, Qb- and Qc-SNAREs (7) with one of each type of SNARE being required for a functional SNAREpin. Intracellular location (PM-plasma membrane, ER-endoplasmic reticulum) is shown: Golgi-vacuole denotes those

SNAREs localized to the prevacuolar compartment but also to Golgi or vacuole. The four SNAREs not anchored via a transmembrane segment are designated with an asterisks. The number of SNARE motifs is shown; note Sec9 and Spo20 have two motifs and fulfill the

requirement of both Qb- and Qc-SNARE within the plasma membrane SNAREpin. The approximate size of the N-terminal domain proximal

to the SNARE motif is indicated with references for the functional and/or structural analyses of the N-terminal domains given

| Name      | Location      | SNARE motifs | N-term domain | Function of N-terminal domain | References |
|-----------|---------------|--------------|---------------|-------------------------------|------------|
| <b>Qa</b> |               |              |               |                               |            |
| Ufe1      | ER            | 1            | 253           | SM (Sly1) recruitment         | (54)       |
| Sed5      | Golgi         | 1            | 248           | SM (Sly1) recruitment         | (54,59)    |
| Tlg2      | Golgi         | 1            | 242           | SM (Vps45) recruitment        | (55,56)    |
| Pep12     | Golgi-vacuole | 1            | 194           | SM (Vps45) recruitment        | (53)       |
| Vam3      | vacuole       | 1            | 185           | SM (Vps33) recruitment        | (67)       |
| Sso1      | PM            | 1            | 188           | SM (Sec1) recruitment         | (68,69)    |
| Sso2      | PM            | 1            | 193           | SM (Sec1) recruitment         | (68,69)    |
| <b>Qb</b> |               |              |               |                               |            |
| Sec20     | ER            | 1            | 201           | Tip20 recruitment.            | (64)       |
| Bos1      | ER-Golgi      | 1            | 150           | ?                             |            |
| Gos1      | ER-Golgi      | 1            | 133           | ?                             |            |
| Vti1      | Golgi-vacuole | 1            | 124           | ?                             | (70)       |
| Sec9*     | PM            | 2            | 432           | ?                             |            |
| Spo20*    | PM            | 2            | 178           | ?                             | (62)       |
| <b>Qc</b> |               |              |               |                               |            |
| Slt1      | ER            | 1            | 148           | Frq1 recruitment?             |            |
| Sft1      | Golgi         | 1            | 4             | None                          |            |
| Bet1      | Golgi         | 1            | 50            | ?                             |            |
| Tlg1      | Golgi         | 1            | 130           | ?                             |            |
| Syn8      | Golgi-vacuole | 1            | 163           | Glc7 recruitment?             |            |
| Vam7*     | vacuole       | 1            | 247           | PHOX domain, PI-binding       | (50)       |
| Sec9*     | PM            | 2            | 432           | ?                             |            |
| Spo20*    | PM            | 2            | 178           | ?                             | (62)       |
| <b>R</b>  |               |              |               |                               |            |
| Sec22     | ER-Golgi      | 1            | 128           | ?                             | (58)       |
| Ykt6*     | Golgi-vacuole | 1            | 135           | Regulation/sorting of Ykt6?   | (49,60)    |
| Nyv1      | Golgi-vacuole | 1            | 160           | ?                             |            |
| Snc1      | PM-vesicles   | 1            | 23            | None?                         |            |
| Snc2      | PM-vesicles   | 1            | 22            | None?                         |            |

| Table 1 Comparative analysis of Sec22 orthologs of different species | Query coverage | E value | Max Identity (%) | NCBI Reference number |
|----------------------------------------------------------------------|----------------|---------|------------------|-----------------------|
| <i>Fusarium graminearum</i>                                          | 100            | 6e-159  | 100              | XP_011323737.1        |
| <i>Alternaria alternata</i>                                          | 100            | 7e-154  | 97               | KIL91621.1            |
| <i>Saccharomyces cerevisiae</i>                                      | 99             | 3e-67   | 46               | NP_013370.1           |
| <i>Schizosaccharomyces pombe</i>                                     | 100            | 1e-82   | 55               | NP_596218.2           |

---

|                                       |     |        |    |                |
|---------------------------------------|-----|--------|----|----------------|
| <i>Trichoderma harzianum</i>          | 100 | 1e-124 | 79 | KKP06674.1     |
| <i>Sclerotinia sclerotiorum</i>       | 100 | 2e-122 | 75 | XP_001590003.1 |
| <i>Neurospora crassa</i>              | 100 | 4e-116 | 75 | XP_960888.1    |
| <i>F. verticillioides</i>             | 100 | 3e-152 | 96 | XP_018749557.1 |
| <i>Arabidopsis thaliana</i>           | 98  | 5e-48  | 40 | NP_172653.1    |
| <i>Drosophila melanogaster</i>        | 96  | 3e-37  | 37 | NP_001259103.1 |
| <i>Plasmodium falciparum</i>          | 86  | 6e-28  | 31 | XP_001351271.1 |
| <i>Neonectria ditissima</i>           | 100 | 4e-136 | 84 | KPM41255.1     |
| <i>Cordyceps confragosa</i>           | 100 | 1e-129 | 80 | OAA75842.1     |
| <i>Botrytis cinerea</i>               | 100 | 3e-122 | 75 | CCD48716.1     |
| <i>Colletotrichum gloeosporioides</i> | 100 | 2e-128 | 80 | EQB50290.1     |
| <i>Homo sapiens</i>                   | 75  | 9e-39  | 43 | XP_016858345.1 |
| <i>Caenorhabditis elegans</i>         | 97  | 1e-34  | 34 | NP_508198.1    |
| <i>Glycine max</i>                    | 98  | 8e-44  | 37 | XP_003547819.1 |
| <i>Mus musculus</i>                   | 100 | 5e-45  | 39 | NP_035472.1    |

---
